# Supplementary material for: Evidence of Recombination in Intrapatient Populations of Hepatitis C Virus
Source: PubMed Central journal article supplement (PMC2528950; doi:10.1371/journal.pone.0003239), 2008-09-18
Supplement: pone.0003239.s002.pdf [file pone.0003239.s002.pdf]

## One breakpoint events:

| NS5A  |         |       |              | Trees (nt) |         | test 1 vs 2 |                |         |         | test 2 vs 1 |                |         |         |
|-------|---------|-------|--------------|------------|---------|-------------|----------------|---------|---------|-------------|----------------|---------|---------|
| Group | Patient | Event | Breakpoint 1 | 1          | 2       | -lk best    | %Diff in logLK | p-SH    | p-ELW   | -lk best    | %Diff in logLK | p-SH    | p-ELW   |
| HCV O | nA28T0  | 1     | 389-416      | 1-389      | 390-743 | 1049,1100   | 1,1948         | <0,0001 | <0,0001 | 1059,5500   | 2,8149         | <0,0001 | <0,0001 |
|       | nC29T0  | 1     | 370-446      | 1-370      | 371-743 | 726,5000    | 2,2409         | <0,0001 | <0,0001 | 981,5200    | 3,1991         | <0,0001 | <0,0001 |
|       |         | 2     | 400-407      | 1-400      | 401-743 | 786,8100    | 2,2685         | <0,0001 | <0,0001 | 915,3100    | 2,8254         | 0,0030  | <0,0001 |
|       |         | 3     | 228-237      | 1-228      | 229-743 | 437,5100    | 1,7872         | <0,0001 | <0,0001 | 1317,0800   | 4,7344         | <0,0001 | <0,0001 |
|       | nC35T0  | 1     | 428-437      | 1-428      | 429-743 | 1600,3600   | 4,1919         | <0,0001 | <0,0001 | 1044,5600   | 2,9408         | <0,0001 | <0,0001 |
|       |         | 2     | 369-390      | 1-369      | 370-743 | 1278,2900   | 3,9038         | <0,0001 | <0,0001 | 1354,1600   | 4,0380         | <0,0001 | <0,0001 |
|       |         | 3     | 424-464      | 1-424      | 425-743 | 1572,5000   | 4,2385         | <0,0001 | <0,0001 | 1065,6300   | 2,9224         | <0,0001 | <0,0001 |
|       | nG05T0  | 1     | 576-597      | 1-576      | 597-741 | 1552,4800   | 2,5646         | <0,0001 | <0,0001 | 390,2300    | 1,0786         | <0,0001 | <0,0001 |
|       |         | 2     | 258-276      | 1-258      | 259-741 | 641,1100    | 1,0679         | <0,0001 | <0,0001 | 1225,6100   | 3,2048         | <0,0001 | <0,0001 |
|       | nG07T0  | 1     | 474-475      | 1-474      | 475-741 | 1292,9800   | 2,3355         | <0,0001 | <0,0001 | 1040,0800   | 1,7573         | <0,0001 | <0,0001 |
|       | nG08T0  | 1     | 345-420      | 1-345      | 346-743 | 772,6800    | 1,3974         | <0,0001 | <0,0001 | 943,8900    | 2,2543         | <0,0001 | <0,0001 |
|       |         | 2     | 443-496      | 1-443      | 444-743 | 1074,8000   | 1,5792         | <0,0001 | <0,0001 | 672,6700    | 1,5452         | <0,0001 | <0,0001 |
| HCV T | nC05T1  | 1     | 266-338      | 1-266      | 267-743 | 695,9200    | 2,4511         | <0,0001 | <0,0001 | 1177,2100   | 2,6092         | <0,0001 | <0,0001 |
|       |         | 2     | 341-359      | 1-341      | 342-743 | 896,8900    | 2,0425         | <0,0001 | <0,0001 | 976,2800    | 2,1970         | <0,0001 | <0,0001 |
|       | nG07T2  | 1     | 585-599      | 1-585      | 586-743 | 2121,7600   | 3,8772         | <0,0001 | <0,0001 | 574,2200    | 1,8352         | <0,0001 | <0,0001 |
|       |         | 2     | 390-401      | 1-390      | 391-743 | 1266,5700   | 2,7560         | <0,0001 | <0,0001 | 1359,7900   | 3,5283         | <0,0001 | <0,0001 |
|       |         | 3     | 281-326      | 1-281      | 282-743 | 916,5600    | 2,6781         | <0,0001 | <0,0001 | 1741,1810   | 3,8880         | <0,0001 | <0,0001 |

| E1-E2   |         |         | Trees (nt) |         | test 1 vs 2 |           |                |         | test 2 vs 1 |           |                |         |         |
|---------|---------|---------|------------|---------|-------------|-----------|----------------|---------|-------------|-----------|----------------|---------|---------|
| Group   | Patient | Event   | Breakpoint | 1       | 2           | -lk best  | %Diff in logLK | p-SH    | p-ELW       | -lk best  | %Diff in logLK | p-SH    | p-ELW   |
| HCV 0-0 | EC0600  | 2       | 199-200    | 1-199   | 200-534     | 424,7200  | 2,1448         | <0,0001 | <0,0001     | 1030,8700 | 1,4607         | <0,0001 | <0,0001 |
|         |         | 3       | 357-375    | 1-357   | 358-534     | 961,5000  | 3,5780         | <0,0001 | <0,0001     | 431,5300  | 0,4253         | <0,0001 | <0,0001 |
|         |         | 4       | 135-147    | 1-135   | 136-534     | 257,1200  | 1,0309         | <0,0001 | <0,0001     | 1368,8500 | 2,7168         | <0,0001 | <0,0001 |
|         | V035    | 1       | 264-367    | 1-265   | 266-534     | 791,1000  | 4,5611         | <0,0001 | <0,0001     | 681,8200  | 3,0000         | <0,0001 | <0,0001 |
|         |         | 2       | 135-147    | 1-135   | 136-534     | 258,4600  | 0,5230         | 0,0220  | 0,0180      | 1358,0700 | 4,6291         | <0,0001 | <0,0001 |
| HCV 0-T | C230T   | 1       | 312-351    | 1-312   | 313-534     | 963,2900  | 3,7681         | <0,0001 | <0,0001     | 555,4800  | 1,7551         | <0,0001 | <0,0001 |
|         |         | 2       | 223-231    | 1-223   | 224-534     | 623,0700  | 1,9067         | <0,0001 | <0,0001     | 911,8400  | 2,1119         | 0,0010  | <0,0001 |
|         | C300T   | 2       | 242-320    | 1-242   | 243-531     | 654,0300  | 1,6379         | <0,0001 | <0,0001     | 866,6900  | 1,8718         | <0,0001 | <0,0001 |
|         | C5703   | 1       | 264-285    | 1-264   | 265-531     | 794,7300  | 1,9083         | <0,0001 | <0,0001     | 631,8200  | 0,7926         | <0,0001 | <0,0001 |
| HCV 0   | A16T0   | 2       | 264-295    | 1-264   | 265-471     | 1860,5400 | 12,8531        | <0,0001 | <0,0001     | 1098,6000 | 4,4094         | <0,0001 | <0,0001 |
|         | A21T0   | 2       | 211-214    | 1-211   | 212-471     | 836,3600  | 2,4001         | <0,0001 | <0,0001     | 1245,1100 | 3,2024         | <0,0001 | <0,0001 |
|         | A28T0   | 1       | 258-291    | 1-258   | 259-471     | 1267,6400 | 12,1686        | <0,0001 | <0,0001     | 1534,0900 | 4,5292         | <0,0001 | <0,0001 |
|         |         | 2       | 258-270    | 1-258   | 259-471     | 1267,6400 | 12,1686        | <0,0001 | <0,0001     | 1534,0900 | 4,5292         | <0,0001 | <0,0001 |
|         | C28T0   | 1       | 233-242    | 1-233   | 234-471     | 1013,8400 | 3,8935         | <0,0001 | <0,0001     | 1084,9600 | 4,7759         | <0,0001 | <0,0001 |
|         |         | 2       | 250-276    | 1-250   | 251-471     | 119,7400  | 5,9621         | <0,0001 | <0,0001     | 933,6700  | 4,3859         | <0,0001 | <0,0001 |
|         | C29T0   | 1       | 223-229    | 1-223   | 224-477     | 598,8500  | 2,2007         | <0,0001 | <0,0001     | 616,1100  | 3,2204         | <0,0001 | <0,0001 |
|         |         | 2       | 232-258    | 1-232   | 233-477     | 611,9800  | 2,1235         | <0,0001 | <0,0001     | 944,7700  | 3,4150         | <0,0001 | <0,0001 |
|         | C32T0   | 2       | 232-242    | 1-232   | 233-471     | 992,2300  | 5,1973         | <0,0001 | <0,0001     | 1397,9600 | 4,0448         | <0,0001 | <0,0001 |
|         |         | 3       | 249-282    | 1-249   | 250-471     | 1126,3400 | 5,2045         | <0,0001 | <0,0001     | 876,0300  | 3,8205         | <0,0001 | <0,0001 |
|         |         | 4       | 230-249    | 1-230   | 231-471     | 970,4000  | 4,3072         | <0,0001 | <0,0001     | 1034,5100 | 4,2798         | <0,0001 | <0,0001 |
|         | G08T0   | 1       | 249-285    | 1-249   | 250-471     | 1331,2000 | 12,2327        | <0,0001 | <0,0001     | 1255,0800 | 8,0499         | <0,0001 | <0,0001 |
| 2       |         | 285-294 | 1-285      | 286-471 | 1518,1700   | 12,6229   | <0,0001        | <0,0001 | 1096,3800   | 8,0720    | <0,0001        | <0,0001 |         |
| 3       |         | 289-294 | 1-289      | 290-471 | 1556,8800   | 12,7090   | <0,0001        | <0,0001 | 1060,8700   | 7,7520    | <0,0001        | <0,0001 |         |
| HCV T   | A21T1   | 2       | 211-215    | 1-211   | 212-472     | 1277,4100 | 4,3944         | <0,0001 | <0,0001     | 2222,0800 | 5,6507         | <0,0001 | <0,0001 |
|         | G17T1   | 2       | 313-322    | 1-313   | 314-472     | 1289,2500 | 10,1701        | <0,0001 | <0,0001     | 635,3900  | 4,0986         | <0,0001 | <0,0001 |
|         | G16T1   | 1       | 325-354    | 1-325   | 326-480     | 1459,2200 | 6,0599         | <0,0001 | <0,0001     | 718,3500  | 3,4711         | <0,0001 | <0,0001 |
|         |         | 2       | 234-247    | 1-234   | 235-480     | 972,4400  | 4,3007         | <0,0001 | <0,0001     | 1175,0800 | 4,6153         | <0,0001 | <0,0001 |
|         |         | 3       | 285-319    | 1-285   | 286-480     | 1230,0100 | 1,0780         | <0,0001 | <0,0001     | 895,1800  | 4,1196         | 0,0010  | <0,0001 |
| eG26T2  | 1       | 301-333 | 1-301      | 302-472 | 989,5500    | 4,0999    | <0,0001        | <0,0001 | 491,1000    | 1,4022    | 0,0030         | <0,0001 |         |

| Two samples  |              |       |            | Trees (nt) |         | test 1 vs 2 |                |         |         | test 2 vs 1 |                |         |         |
|--------------|--------------|-------|------------|------------|---------|-------------|----------------|---------|---------|-------------|----------------|---------|---------|
| Group        | Patient      | Event | Breakpoint | 1          | 2       | -lk best    | %Diff in logLK | p-SH    | p-ELW   | -lk best    | %Diff in logLK | p-SH    | p-ELW   |
| NS5a(T0-T1)  | nC29T0-T1    | 1     | 370-407    | 1-370      | 371-743 | 830,0300    | 3,1687         | <0,0001 | <0,0001 | 1116,3300   | 5,3226         | <0,0001 | <0,0001 |
|              |              | 2     | 228-237    | 1-228      | 229-743 | 521,7100    | 3,3323         | <0,0001 | <0,0001 | 1469,9800   | 7,0503         | <0,0001 | <0,0001 |
|              |              | 3     | 297-329    | 1-297      | 298-743 | 655,8600    | 3,6121         | <0,0001 | <0,0001 | 1312,6100   | 5,6075         | <0,0001 | <0,0001 |
|              |              | 4     | 370-446    | 1-370      | 371-743 | 829,6900    | 3,5654         | <0,0001 | <0,0001 | 1115,4600   | 5,3266         | <0,0001 | <0,0001 |
|              | nG07T0-T2    | 1     | 258-327    | 1-258      | 259-741 | 1592,9500   | 76,3234        | <0,0001 | <0,0001 | 2358,2500   | 8,8285         | <0,0001 | <0,0001 |
|              |              | 5     | 421-447    | 1-421      | 422-741 | 1767,3300   | 6,1794         | <0,0001 | <0,0001 | 1596,6600   | 6,8207         | <0,0001 | <0,0001 |
|              |              | 6     | 105-114    | 1-105      | 160-741 | 435,9500    | 2,6969         | <0,0001 | <0,0001 | 3138,0400   | 8,9886         | <0,0001 | <0,0001 |
|              |              | 8     | 225-327    | 1-225      | 226-741 | 940,6900    | 5,3209         | <0,0001 | <0,0001 | 2464,7700   | 8,6814         | <0,0001 | <0,0001 |
|              |              | 9     | 421-439    | 1-421      | 422-741 | 1592,9500   | 5,3617         | <0,0001 | <0,0001 | 1998,3300   | 6,5172         | <0,0001 | <0,0001 |
| E1-E2(T0-T1) | eA21T0-T1    | 1     | 210-214    | 1-210      | 211-471 | 2242,5100   | 9,4682         | <0,0001 | <0,0001 | 2242,5100   | 9,4682         | <0,0001 | <0,0001 |
|              | eC29T0-T1    | 2     | 318-321    | 1-318      | 319-477 | 1027,6400   | 9,8595         | <0,0001 | <0,0001 | 482,3400    | 2,9946         | <0,0001 | <0,0001 |
|              | eG16T0-T1    | 1     | 234-247    | 1-234      | 235-480 | 1016,4000   | 4,3796         | <0,0001 | <0,0001 | 1312,5600   | 4,3921         | <0,0001 | <0,0001 |
|              |              | 2     | 259-265    | 1-259      | 260-480 | 1128,4400   | 4,8346         | <0,0001 | <0,0001 | 1206,9600   | 4,5046         | <0,0001 | <0,0001 |
|              | eG26T0-T1-T2 | 1     | 301-333    | 1-301      | 302-472 | 1023,7300   | 3,5151         | 0,0010  | 0,0010  | 555,9400    | 2,0557         | 0,0010  | <0,0001 |

## Two breakpoints events:

| NSSA | Group | Patient   | Event | Breakpoint 1 | Breakpoint 2 | Trees (nt) |         |         | test 2 vs 1 |                |         |         | test 2 vs 3    |         |         |
|------|-------|-----------|-------|--------------|--------------|------------|---------|---------|-------------|----------------|---------|---------|----------------|---------|---------|
|      |       |           |       |              |              | 1          | 2       | 3       | -lk best    | %Diff in logLK | p-SH    | p-ELW   | %Diff in logLK | p-SH    | p-ELW   |
|      | HCV 0 | nC36T0    | 1     | 74-89        | 356-418      | 1-88       | 89-356  | 357-743 | 842,3100    | 3,8954         | <0,0001 | <0,0001 | 2,7645         | <0,0001 | <0,0001 |
|      |       | nG07T0    | 2     | 258-327      | 600-616      | 1-326      | 327-600 | 601-741 | 855,7500    | 1,7840         | <0,0001 | <0,0001 | 2,3018         | <0,0001 | <0,0001 |
|      | HCV T | nG07T2tfa | 4     | 59-80        | 390-423      | 1-79       | 80-390  | 391-743 | 945,7900    | 2,0402         | 0,0010  | <0,0001 | 1,2180         | <0,0001 | <0,0001 |

| E1E2 | Group   | Patient | Event | Breakpoint 1 | Breakpoint 2 | Trees (nt) |         |         | test 2 vs 1 |                |         |         | test 2 vs 3    |         |         |
|------|---------|---------|-------|--------------|--------------|------------|---------|---------|-------------|----------------|---------|---------|----------------|---------|---------|
|      |         |         |       |              |              | 1          | 2       | 3       | -lk best    | %Diff in logLK | p-SH    | p-ELW   | %Diff in logLK | p-SH    | p-ELW   |
|      | HCV 0-0 | EC0600  | 1     | 165-177      | 306-331      | 1-176      | 177-306 | 307-534 | 346,8700    | 0,3023         | <0,0001 | <0,0001 | 0,3243         | <0,0001 | <0,0001 |
|      | HCV 0-T | C300T   | 1     | 242-261      | 450-477      | 1-260      | 261-450 | 451-531 | 490,3900    | 1,8263         | <0,0001 | <0,0001 | 1,6614         | <0,0001 | <0,0001 |
|      | HCV 0   | A16T0   | 1     | 176-190      | 348-351      | 1-189      | 190-348 | 349-471 | 1050,2700   | 12,1583        | <0,0001 | <0,0001 | 6,0974         | <0,0001 | <0,0001 |
|      |         | A21T0   | 1     | 191-196      | 294-343      | 1-195      | 196-294 | 295-471 | 477,6700    | 4,4200         | <0,0001 | <0,0001 | 2,9560         | <0,0001 | <0,0001 |
|      |         | C32T0   | 1     | 42-162       | 264-282      | 1-161      | 162-264 | 265-471 | 577,4900    | 4,1762         | <0,0001 | <0,0001 | 8,3820         | <0,0001 | <0,0001 |
|      |         | G08T0   | 4     | 81-112       | 249-285      | 1-111      | 112-249 | 250-471 | 859,6600    | 10,2248        | <0,0001 | <0,0001 | 9,7831         | <0,0001 | <0,0001 |
|      | HCV T   | A21T1   | 1     | 157-170      | 250-277      | 1-169      | 170-250 | 251-472 | 631,2500    | 7,2510         | <0,0001 | <0,0001 | 7,8971         | <0,0001 | <0,0001 |
|      |         | G17T1   | 1     | 177-191      | 313-322      | 1-191      | 191-313 | 314-472 | 469,3000    | 6,8658         | 0,0010  | <0,0001 | 2,4021         | <0,0001 | <0,0001 |
|      |         |         | 3     | 178-198      | 250-259      | 1-197      | 198-250 | 251-472 | 223,4500    | 4,4790         | <0,0001 | <0,0001 | 1,9923         | 0,0010  | <0,0001 |

| Two Samples | Group       | Patient   | Event | Breakpoint 1 | Breakpoint 2 | Trees (nt) |         |         | test 2 vs 1 |                |         |         | test 2 vs 3    |         |         |
|-------------|-------------|-----------|-------|--------------|--------------|------------|---------|---------|-------------|----------------|---------|---------|----------------|---------|---------|
|             |             |           |       |              |              | 1          | 2       | 3       | -lk best    | %Diff in logLK | p-SH    | p-ELW   | %Diff in logLK | p-SH    | p-ELW   |
|             | NSSa(T0-T1) | nG07T0-T2 | 2     | 258-327      | 600-616      | 1-258      | 259-615 | 616-741 | 1558,2700   | 6,1082         | <0,0001 | <0,0001 | 4,6382         | <0,0001 | <0,0001 |
|             |             |           | 3     | 327-336      | 547-573      | 1-327      | 328-572 | 573-741 | 1414,8800   | 4,5397         | <0,0001 | <0,0001 | 3,6425         | <0,0001 | <0,0001 |
|             |             |           | 4     | 258-327      | 480-491      | 1-258      | 259-490 | 491-741 | 873,6700    | 3,3578         | <0,0001 | <0,0001 | 2,4776         | <0,0001 | <0,0001 |
|             |             |           | 7     | 105-114      | 547-573      | 1-105      | 106-572 | 573-741 | 1998,3300   | 6,5172         | <0,0001 | <0,0001 | 4,9738         | <0,0001 | <0,0001 |
